# Supplementary material for: Enhancement of Nicotiana tabacum Resistance Against Dehydration-Induced Leaf Senescence via Metabolite/Phytohormone-Gene Regulatory Networks Modulated by Melatonin
Source: Front Plant Sci. 2021 Jul 6;12:686062. doi: 10.3389/fpls.2021.686062 (PMC8291779; doi:10.3389/fpls.2021.686062)
Supplement: Supplementary file 4 [file Table_4.XLSX]

## Sheet: Sheet1
Supplementary Table S4. Differentially expressed genes in MEL-treated leaves compared with CK
gene_id	MEL	CK	log2FoldChange	pvalue	padj	gene_chr	gene_start	gene_end	gene_strand	gene_length	gene_description
gene_44949	3794.26	891.728	2.0871	1.65584e-237	7.65131e-233	Ntab-K326_AWOJ-SS2256	4362	5475	.	1114	-
gene_49443	2466.57	678.704	1.86309	7.44078e-174	1.14608e-169	Ntab-K326_AWOJ-SS2861	1507	2648	.	1142	PF00504:Chlorophyll A-B binding protein
gene_72501	3622.31	1181.33	1.61514	2.13507e-159	2.46643e-155	Ntab-K326_AWOJ-SS7184	30884	37783	-	3049	-
gene_13835	1356.72	259.313	2.38743	7.93752e-139	7.33554e-135	Ntab-K326_AWOJ-SS13015	239707	241245	.	1539	PF04674:Phosphate-induced protein 1 conserved region
gene_67972	1039.5	188.558	2.46862	1.35948e-117	6.97988e-114	Ntab-K326_AWOJ-SS6198	2067	3340	.	1274	PF04674:Phosphate-induced protein 1 conserved region
gene_31246	713.437	111.818	2.67037	7.38597e-110	2.84409e-106	Ntab-K326_AWOJ-SS18030	6265	9521	-	1682	PF00085:Thioredoxin|PF01507:Phosphoadenosine phosphosulfate reductase family
gene_47230	1250.37	292.001	2.09333	1.10146e-105	3.9151e-102	Ntab-K326_AWOJ-SS257752	6391	7653	.	1263	-
gene_33744	2004.67	553.129	1.85617	1.27276e-101	4.20085e-98	Ntab-K326_AWOJ-SS18413	99542	103136	+	1640	PF00085:Thioredoxin|PF01507:Phosphoadenosine phosphosulfate reductase family
gene_19988	1046.27	274.583	1.92918	8.3131e-101	2.56088e-97	Ntab-K326_AWOJ-SS147	152583	155763	-	1839	PF00085:Thioredoxin|PF01507:Phosphoadenosine phosphosulfate reductase family
gene_16996	1333.79	371.374	1.84177	3.8354e-96	8.86131e-93	Ntab-K326_AWOJ-SS13769	39273	41466	-	2194	PF06219:Protein of unknown function (DUF1005)
gene_76713	825.59	182.543	2.18438	1.77074e-88	3.14701e-85	Ntab-K326_AWOJ-SS815	207281	223424	+	3271	PF06203:CCT motif
gene_65757	3592.86	1149.13	1.64213	5.8985e-88	1.00947e-84	Ntab-K326_AWOJ-SS5699	188257	218584	+	3138	-
gene_60946	720.418	146.368	2.30054	8.39432e-88	1.3853e-84	Ntab-K326_AWOJ-SS4678	88255	91422	+	1198	PF01357:Pollen allergen|PF03330:Lytic transglycolase
gene_61649	950.316	213.955	2.1593	4.18824e-81	6.24291e-78	Ntab-K326_AWOJ-SS4827	236017	240809	-	3749	PF00464:Serine hydroxymethyltransferase
gene_60513	572.771	102.04	2.4956	6.96496e-81	1.00574e-77	Ntab-K326_AWOJ-SS460	294820	297543	-	1615	PF01357:Pollen allergen|PF03330:Lytic transglycolase
gene_32906	739.704	175.304	2.07398	1.4645e-75	1.87977e-72	Ntab-K326_AWOJ-SS18271	16939	20854	-	2732	-
gene_83255	513.9	93.2197	2.45627	2.19332e-74	2.66708e-71	Ntab-K326_AWOJ-SS9485	34724	46199	+	3529	PF06203:CCT motif
gene_40342	709.239	177.595	1.99273	7.71425e-70	8.48715e-67	Ntab-K326_AWOJ-SS19803	324500	327060	-	2068	PF01619:Proline dehydrogenase
gene_80575	723.663	205.599	1.81472	1.38662e-68	1.42385e-65	Ntab-K326_AWOJ-SS89	531914	534746	+	2037	PF00415:Regulator of chromosome condensation (RCC1) repeat
gene_65760	782.705	199.643	1.96272	2.9808e-66	2.86952e-63	Ntab-K326_AWOJ-SS5699	35434	40366	-	2494	-
gene_17461	556.599	102.486	2.43493	4.95803e-64	4.32265e-61	Ntab-K326_AWOJ-SS1394	384332	388147	+	834	PF04674:Phosphate-induced protein 1 conserved region
gene_68375	386.502	51.943	2.88371	5.2727e-62	4.42984e-59	Ntab-K326_AWOJ-SS6292	24232	26305	+	1669	PF06219:Protein of unknown function (DUF1005)
gene_13832	898.691	247.294	1.86596	6.34562e-62	5.14418e-59	Ntab-K326_AWOJ-SS13015	169561	170711	.	1151	PF04674:Phosphate-induced protein 1 conserved region
gene_35202	958.622	291.528	1.71447	5.21884e-59	3.82781e-56	Ntab-K326_AWOJ-SS18588	119993	120824	.	832	-
gene_51759	554.683	128.413	2.11391	2.87186e-57	1.98064e-54	Ntab-K326_AWOJ-SS3147	20545	22819	+	1822	PF06219:Protein of unknown function (DUF1005)
gene_9328	365.466	60.7617	2.57809	6.68197e-57	4.5406e-54	Ntab-K326_AWOJ-SS12080	105053	109083	+	1998	PF06219:Protein of unknown function (DUF1005)
gene_58245	301.915	44.0201	2.77543	4.04045e-49	2.14599e-46	Ntab-K326_AWOJ-SS405	395562	397177	.	1616	PF05938:Plant self-incompatibility protein S1
gene_8832	463.046	128.707	1.84931	1.31706e-48	6.83804e-46	Ntab-K326_AWOJ-SS11986	84374	89650	+	1561	PF01150:GDA1/CD39 (nucleoside phosphatase) family
gene_59549	670.33	218.068	1.61655	9.35913e-48	4.70072e-45	Ntab-K326_AWOJ-SS4353	535826	537300	.	1475	-
gene_13763	428.186	107.264	1.99011	5.84625e-46	2.72872e-43	Ntab-K326_AWOJ-SS13005	174371	181271	+	5064	-
gene_54197	952.877	312.743	1.60627	2.29142e-45	1.05882e-42	Ntab-K326_AWOJ-SS347	412256	414917	+	1612	-
gene_68143	542.555	178.122	1.60634	1.46353e-42	5.93217e-40	Ntab-K326_AWOJ-SS6232	896	4865	-	1387	-
gene_46057	450.522	109.727	2.02877	1.35794e-41	5.18575e-39	Ntab-K326_AWOJ-SS240	163132	164218	.	1087	-
gene_47054	350.652	78.8136	2.1421	2.31017e-40	8.27508e-38	Ntab-K326_AWOJ-SS255273	56892	60528	+	1235	-
gene_25630	1836.89	434.643	2.08082	1.10901e-37	3.66038e-35	Ntab-K326_AWOJ-SS16581	39363	71853	-	4261	PF04674:Phosphate-induced protein 1 conserved region
gene_48610	451.966	143.138	1.65767	2.18264e-34	6.30346e-32	Ntab-K326_AWOJ-SS276455	2612	10149	.	7538	PF03732:Retrotransposon gag protein
gene_52184	283.449	62.0633	2.18627	6.01868e-34	1.6958e-31	Ntab-K326_AWOJ-SS3208	13472	14740	.	1269	PF07059:Protein of unknown function (DUF1336)
gene_73243	332.482	98.6924	1.74478	8.97592e-32	2.26644e-29	Ntab-K326_AWOJ-SS7334	173144	175431	+	1732	PF06219:Protein of unknown function (DUF1005)
gene_78081	433.065	143.585	1.5929	1.35664e-31	3.37029e-29	Ntab-K326_AWOJ-SS843	240052	244103	-	1369	-
gene_38927	411.267	123.139	1.73834	7.86351e-31	1.89248e-28	Ntab-K326_AWOJ-SS195	413687	418806	+	5120	-
gene_38075	367.536	119.766	1.61196	3.75786e-30	8.7258e-28	Ntab-K326_AWOJ-SS19267	154226	160657	+	2491	PF03727:Hexokinase|PF00349:Hexokinase
gene_28884	344.739	99.981	1.77672	8.82337e-28	1.79608e-25	Ntab-K326_AWOJ-SS17637	146020	147968	+	1949	PF00226:DnaJ domain
gene_60591	258.064	73.6496	1.81668	4.23598e-27	8.05499e-25	Ntab-K326_AWOJ-SS4616	604546	610198	+	1742	-
gene_5648	245.521	63.5348	1.95845	6.25019e-27	1.17402e-24	Ntab-K326_AWOJ-SS11267	72989	166854	+	1662	PF06955:Xyloglucan endo-transglycosylase (XET) C-terminus|PF00722:Glycosyl hydrolases family 16
gene_48999	268.253	77.8726	1.77789	1.02159e-26	1.91116e-24	Ntab-K326_AWOJ-SS281204	1811	6730	+	1327	PF06200:tify domain|PF09425:Divergent CCT motif
gene_40685	249.494	68.5177	1.8756	1.2264e-26	2.28505e-24	Ntab-K326_AWOJ-SS19875	94943	98575	-	3281	PF06219:Protein of unknown function (DUF1005)
gene_32225	148.555	21.4078	2.77971	3.07685e-26	5.61956e-24	Ntab-K326_AWOJ-SS18150	694990	698446	-	1246	PF00722:Glycosyl hydrolases family 16|PF06955:Xyloglucan endo-transglycosylase (XET) C-terminus
gene_65017	153.828	24.8143	2.61785	3.2915e-26	5.96445e-24	Ntab-K326_AWOJ-SS5549	31121	45037	-	5117	-
gene_83179	197.899	38.7945	2.33942	6.29295e-25	1.08098e-22	Ntab-K326_AWOJ-SS9467	251174	257798	-	3967	-
gene_80579	246.628	69.5339	1.82271	1.33513e-24	2.23082e-22	Ntab-K326_AWOJ-SS89	516936	527532	-	1048	-
gene_33192	269.66	76.1008	1.82437	2.70605e-24	4.37207e-22	Ntab-K326_AWOJ-SS18324	17082	18909	-	1535	PF03168:Late embryogenesis abundant protein
gene_40665	282.679	93.3586	1.59708	1.40839e-23	2.1912e-21	Ntab-K326_AWOJ-SS19872	532759	534791	-	2033	-
gene_45452	138.94	21.3118	2.7129	2.61307e-23	4.01145e-21	Ntab-K326_AWOJ-SS232580	2	302	.	301	-
gene_14071	158.335	29.0603	2.43907	2.93359e-23	4.48859e-21	Ntab-K326_AWOJ-SS13080	255938	257237	-	1300	-
gene_62474	385.303	120.942	1.67117	3.32875e-22	4.80672e-20	Ntab-K326_AWOJ-SS4972	275638	279905	-	2069	PF14306:PUA-like domain|PF01747:ATP-sulfurylase
gene_27659	271.241	90.0337	1.58667	1.92524e-21	2.62423e-19	Ntab-K326_AWOJ-SS17273	3796	6339	-	1994	PF01619:Proline dehydrogenase
gene_37900	222.079	73.878	1.5914	7.39595e-20	8.92303e-18	Ntab-K326_AWOJ-SS19216	34554	41481	-	2220	-
gene_6978	182.633	47.8491	1.94935	1.20983e-19	1.43712e-17	Ntab-K326_AWOJ-SS1158	185015	197312	+	1315	PF14559:Tetratricopeptide repeat
gene_80456	202.966	57.0196	1.84563	1.80301e-19	2.11994e-17	Ntab-K326_AWOJ-SS888	202520	203791	+	540	PF00249:Myb-like DNA-binding domain
gene_5209	136.916	31.5997	2.12419	3.87745e-19	4.43488e-17	Ntab-K326_AWOJ-SS11169	76501	79818	+	1860	PF02574:Homocysteine S-methyltransferase
gene_11275	197.788	63.4466	1.64092	2.34712e-18	2.58228e-16	Ntab-K326_AWOJ-SS12494	77749	78539	.	791	PF12937:F-box-like
gene_22179	117.29	20.7028	2.50877	5.50133e-18	5.89803e-16	Ntab-K326_AWOJ-SS15430	158563	162453	-	1868	PF01842:ACT domain
gene_57660	144.983	37.1817	1.96189	6.73199e-18	7.18411e-16	Ntab-K326_AWOJ-SS3911	525636	526742	.	1107	-
gene_41191	197.363	64.8178	1.60912	9.30212e-18	9.76892e-16	Ntab-K326_AWOJ-SS20013	143271	146747	+	1256	PF03083:Sugar efflux transporter for intercellular exchange
gene_78282	165.578	47.4652	1.80476	1.04082e-17	1.08811e-15	Ntab-K326_AWOJ-SS84643	5816	7724	.	1909	PF05910:Plant protein of unknown function (DUF868)
gene_83342	429.605	75.9132	2.50204	5.08782e-17	5.05587e-15	Ntab-K326_AWOJ-SS9500	297082	297875	.	794	-
gene_27267	170.754	54.7638	1.63564	8.54145e-17	8.32665e-15	Ntab-K326_AWOJ-SS17138	26836	32429	+	2421	PF03727:Hexokinase|PF00349:Hexokinase
gene_18401	119.453	27.9175	2.09333	8.93181e-17	8.68887e-15	Ntab-K326_AWOJ-SS14208	15574	19254	+	1861	PF06219:Protein of unknown function (DUF1005)
gene_66070	69.8702	2.4876	4.79409	2.07961e-16	1.96915e-14	Ntab-K326_AWOJ-SS5773	74625	76468	.	1844	-
gene_42339	83.9564	13.1882	2.64337	9.03591e-15	7.26052e-13	Ntab-K326_AWOJ-SS20326	15206	17995	-	1639	PF00067:Cytochrome P450
gene_31696	81.7938	13.5467	2.59383	1.08466e-14	8.65629e-13	Ntab-K326_AWOJ-SS18085	450826	452609	.	1784	PF00069:Protein kinase domain|PF03822:NAF domain
gene_67282	76.329	11.9935	2.67164	2.21559e-14	1.7063e-12	Ntab-K326_AWOJ-SS6039	9105	28129	+	1853	-
gene_16975	62.6682	6.60787	3.24109	6.12269e-14	4.49075e-12	Ntab-K326_AWOJ-SS1376	121321	122830	.	1510	-
gene_23996	120.932	32.8276	1.86675	7.05454e-14	5.12541e-12	Ntab-K326_AWOJ-SS16093	90929	98024	.	7096	-
gene_24154	83.7721	17.6008	2.26367	2.33403e-13	1.59779e-11	Ntab-K326_AWOJ-SS1617	42036	43754	.	1719	PF05910:Plant protein of unknown function (DUF868)
gene_48976	95.3079	18.9829	2.35668	4.80553e-13	3.18104e-11	Ntab-K326_AWOJ-SS2808	18352	19311	.	960	-
gene_35	107.93	29.3317	1.86476	1.76499e-12	1.11853e-10	Ntab-K326_AWOJ-SS10	327570	333216	+	2153	-
gene_37024	81.3561	18.6786	2.11188	1.0589e-11	6.21726e-10	Ntab-K326_AWOJ-SS18989	414438	417833	-	2402	PF12906:RING-variant domain|PF12428:Protein of unknown function (DUF3675)
gene_70542	61.3924	11.0856	2.47295	2.93583e-11	1.63444e-09	Ntab-K326_AWOJ-SS6744	59663	61176	+	1072	-
gene_32942	104.095	32.3831	1.67706	1.30589e-10	6.71219e-09	Ntab-K326_AWOJ-SS1828	59147	59850	.	704	-
gene_84639	93.086	26.5275	1.81473	1.3567e-10	6.95786e-09	Ntab-K326_AWOJ-SS9791	1394076	1396688	-	2613	-
gene_42181	85.5795	24.3278	1.81532	1.90833e-10	9.64772e-09	Ntab-K326_AWOJ-SS20299	289377	290356	-	809	PF14299:Phloem protein 2
gene_63431	68.6907	16.8529	2.01788	3.95822e-10	1.89732e-08	Ntab-K326_AWOJ-SS5153	430319	431711	.	1393	-
gene_26826	88.709	27.0945	1.71017	7.65278e-10	3.49426e-08	Ntab-K326_AWOJ-SS17008	29134	32936	-	1828	PF00067:Cytochrome P450
gene_11161	63.2798	14.7976	2.11129	1.35696e-09	5.97164e-08	Ntab-K326_AWOJ-SS124771	12715	17383	-	1749	PF03098:Animal haem peroxidase
gene_63617	67.9308	17.7254	1.93905	3.06332e-09	1.27179e-07	Ntab-K326_AWOJ-SS5218	116627	119854	.	3228	PF00069:Protein kinase domain
gene_12332	84.9068	28.1601	1.59421	3.39847e-09	1.40336e-07	Ntab-K326_AWOJ-SS12702	756636	758230	+	1053	PF00230:Major intrinsic protein
gene_21633	107.542	35.657	1.60355	1.24303e-08	4.82267e-07	Ntab-K326_AWOJ-SS1524	41937	45273	-	2019	-
gene_49207	79.2727	22.8109	1.79819	1.94881e-08	7.3093e-07	Ntab-K326_AWOJ-SS2839	240105	244135	-	2115	PF01842:ACT domain
gene_33711	69.4927	20.79	1.74069	2.13042e-08	7.93251e-07	Ntab-K326_AWOJ-SS1840	230098	231664	.	1567	-
gene_16020	72.7592	23.1264	1.65475	6.11666e-08	2.11488e-06	Ntab-K326_AWOJ-SS13518	151639	157242	-	2432	PF00561:alpha/beta hydrolase fold
gene_31901	36.8794	4.79207	2.95491	8.27894e-08	2.78829e-06	Ntab-K326_AWOJ-SS18109	308374	309522	+	1149	-
gene_21004	62.4486	18.1192	1.7884	9.67029e-08	3.22446e-06	Ntab-K326_AWOJ-SS15018	173136	175119	+	1510	-
gene_52354	61.6776	17.282	1.81714	1.1115e-07	3.65812e-06	Ntab-K326_AWOJ-SS323462	18164	18554	.	391	-
gene_79378	69.6138	20.6841	1.74452	1.95359e-07	6.1957e-06	Ntab-K326_AWOJ-SS8679	293557	294352	.	796	PF02519:Auxin responsive protein
gene_8790	55.8012	14.3939	1.96421	2.68105e-07	8.27008e-06	Ntab-K326_AWOJ-SS11977	371449	372425	.	977	-
gene_33707	56.9671	14.4534	2.00548	2.81712e-07	8.64366e-06	Ntab-K326_AWOJ-SS1840	192936	194870	.	1935	-
gene_18463	65.1235	21.4199	1.60121	3.14129e-07	9.52445e-06	Ntab-K326_AWOJ-SS1422	630316	630853	.	538	-
gene_20811	35.8555	6.60787	2.4373	6.14848e-07	1.77125e-05	Ntab-K326_AWOJ-SS14959	45906	46842	.	937	PF00462:Glutaredoxin
gene_5251	64.4364	20.3697	1.65336	8.05708e-07	2.27013e-05	Ntab-K326_AWOJ-SS11179	213165	220599	-	2215	PF09739:Mini-chromosome maintenance replisome factor
gene_2003	62.7494	19.9792	1.6332	1.13225e-06	3.10129e-05	Ntab-K326_AWOJ-SS10428	104866	107949	-	671	-
gene_68430	56.9733	17.7817	1.67359	1.25199e-06	3.40306e-05	Ntab-K326_AWOJ-SS6309	190690	192466	.	1777	PF00564:PB1 domain
gene_28550	59.0606	18.7932	1.6722	1.45123e-06	3.8929e-05	Ntab-K326_AWOJ-SS17535	396989	402666	+	760	PF00034:Cytochrome c
gene_83177	28.5158	4.42474	2.69141	1.63261e-06	4.33317e-05	Ntab-K326_AWOJ-SS9467	203670	210223	-	1032	-
gene_83648	42.5348	10.802	1.98145	2.27007e-06	5.828e-05	Ntab-K326_AWOJ-SS9560	65988	68164	.	2177	PF14543:Xylanase inhibitor N-terminal|PF14541:Xylanase inhibitor C-terminal
gene_56132	27.5674	4.15226	2.74411	2.52684e-06	6.41186e-05	Ntab-K326_AWOJ-SS368923	4225	7213	-	1665	-
gene_85193	45.534	12.0055	1.94641	2.74902e-06	6.8924e-05	Ntab-K326_AWOJ-SS9928	37789	39556	.	1768	-
gene_30923	61.854	20.1778	1.59693	4.85082e-06	0.000115302	Ntab-K326_AWOJ-SS17997	384472	385181	.	710	-
gene_67061	30.9172	5.93054	2.37387	6.24914e-06	0.00014438	Ntab-K326_AWOJ-SS5996	1036	2618	.	1583	-
gene_10481	47.7063	14.1446	1.75246	7.22669e-06	0.000164336	Ntab-K326_AWOJ-SS123424	1	385	.	385	-
gene_1825	45.9974	14.6079	1.65878	1.10863e-05	0.000240844	Ntab-K326_AWOJ-SS10388	160435	166887	+	2399	-
gene_73771	28.0524	4.23607	2.75537	1.23719e-05	0.000266022	Ntab-K326_AWOJ-SS748	460730	462125	.	1396	PF00657:GDSL-like Lipase/Acylhydrolase
gene_25634	27.0192	4.95978	2.42877	1.34638e-05	0.000287227	Ntab-K326_AWOJ-SS16581	58693	59995	.	1303	PF04674:Phosphate-induced protein 1 conserved region
gene_53717	30.2205	6.0453	2.28746	1.46075e-05	0.000309483	Ntab-K326_AWOJ-SS340417	30	454	.	425	-
gene_77768	38.4359	11.0326	1.79812	2.03957e-05	0.000418493	Ntab-K326_AWOJ-SS8362	47950	50855	+	1227	PF03106:WRKY DNA -binding domain
gene_60602	33.6085	7.45948	2.18761	2.36008e-05	0.000476638	Ntab-K326_AWOJ-SS4616	608221	608533	.	313	-
gene_39347	31.3223	7.47053	2.09288	2.90434e-05	0.000572786	Ntab-K326_AWOJ-SS195704	1654	2348	.	695	-
gene_84012	39.0556	10.3067	1.95829	2.99458e-05	0.000588118	Ntab-K326_AWOJ-SS9648	317588	318561	+	974	-
gene_36398	42.5471	12.3421	1.75552	4.35711e-05	0.000814455	Ntab-K326_AWOJ-SS18798	9574	11012	-	1439	-
gene_70875	39.3706	11.8931	1.71715	4.476e-05	0.000834316	Ntab-K326_AWOJ-SS68006	3556	4478	.	923	-
gene_60212	38.6503	11.9725	1.69317	7.22284e-05	0.00126661	Ntab-K326_AWOJ-SS4511	155302	156355	.	1054	-
gene_45561	37.4367	11.881	1.62912	0.000146489	0.00233897	Ntab-K326_AWOJ-SS233920	133	1328	.	1196	-
gene_19123	33.1297	10.6829	1.65228	0.000179348	0.00277818	Ntab-K326_AWOJ-SS14444	399081	400660	.	1580	-
gene_64223	30.9223	9.35252	1.71741	0.000199347	0.00304208	Ntab-K326_AWOJ-SS5369	559442	560444	.	1003	-
gene_65886	27.1114	6.6432	1.99668	0.000213033	0.003218	Ntab-K326_AWOJ-SS572	141907	142769	.	863	PF13639:Ring finger domain
gene_31682	26.4306	7.24329	1.86829	0.000213206	0.00321956	Ntab-K326_AWOJ-SS18084	2724	7403	-	2416	PF05904:Plant protein of unknown function (DUF863)
gene_32001	29.1573	8.47662	1.77629	0.000247398	0.00364767	Ntab-K326_AWOJ-SS18119	220283	223711	.	3429	-
gene_51844	27.3384	7.86434	1.82549	0.000309189	0.00440956	Ntab-K326_AWOJ-SS316416	4	1195	-	707	-
gene_9731	24.0862	5.34806	2.16398	0.00033523	0.00472121	Ntab-K326_AWOJ-SS12180	380854	382100	.	1247	-
gene_9737	30.1108	9.1628	1.69098	0.000343349	0.00481648	Ntab-K326_AWOJ-SS12180	431041	434002	.	2962	-
gene_20130	24.0365	6.21406	1.94114	0.000349372	0.0048896	Ntab-K326_AWOJ-SS1475	61844	62764	.	921	-
gene_85192	29.9936	9.49147	1.68641	0.000423716	0.00576703	Ntab-K326_AWOJ-SS9928	13115	14084	.	970	-
gene_22284	26.8067	7.89967	1.76588	0.000427269	0.00580683	Ntab-K326_AWOJ-SS15464	58330	64532	-	2629	PF00270:DEAD/DEAH box helicase|PF00271:Helicase conserved C-terminal domain
gene_1453	26.9777	7.55662	1.80327	0.000494796	0.00658133	Ntab-K326_AWOJ-SS10329	409280	413004	-	1911	PF00854:POT family
gene_25570	28.435	9.14842	1.63854	0.00057027	0.00737504	Ntab-K326_AWOJ-SS16557	10248	13170	.	2923	-
gene_78266	27.2627	8.84947	1.62439	0.000633154	0.00807306	Ntab-K326_AWOJ-SS846	470075	472048	.	1974	-
gene_12702	23.854	6.53615	1.89409	0.000677493	0.00854469	Ntab-K326_AWOJ-SS12772	34754	41740	-	6987	-
gene_55745	27.1004	7.32053	1.86689	0.000821257	0.0100686	Ntab-K326_AWOJ-SS363313	1	831	-	747	PF03151:Triose-phosphate Transporter family
gene_48753	223.047	66.8606	1.74061	0.000940345	0.0112802	Ntab-K326_AWOJ-SS2784	299352	300520	+	968	PF06955:Xyloglucan endo-transglycosylase (XET) C-terminus|PF00722:Glycosyl hydrolases family 16
gene_14235	24.9952	7.82576	1.66713	0.00101939	0.0120532	Ntab-K326_AWOJ-SS13137	43252	46264	-	511	-
gene_44204	23.8365	7.56872	1.65414	0.00115508	0.0133535	Ntab-K326_AWOJ-SS21770	6234	8377	.	2144	PF01699:Sodium/calcium exchanger protein
gene_35864	24.9266	7.23777	1.78525	0.00142825	0.0159108	Ntab-K326_AWOJ-SS18678	152080	152695	.	616	-
gene_61965	23.4241	7.52129	1.63458	0.00146698	0.0162674	Ntab-K326_AWOJ-SS488	143032	144684	.	1653	-
gene_54080	22.6925	7.02158	1.66883	0.00189007	0.0200913	Ntab-K326_AWOJ-SS345505	2150	2953	.	804	-
gene_34385	22.6758	7.34148	1.60628	0.00371246	0.0346837	Ntab-K326_AWOJ-SS18472	14934	19997	-	2301	PF13445:RING-type zinc-finger
gene_28526	156.309	508.208	-1.70098	1.17376e-44	5.16544e-42	Ntab-K326_AWOJ-SS17530	142420	190011	-	1532	-
gene_20667	180.99	560.88	-1.63272	2.11351e-44	9.12722e-42	Ntab-K326_AWOJ-SS14927	22954	24440	+	1240	PF00046:Homeobox domain|PF02183:Homeobox associated leucine zipper
gene_82465	119.988	434.335	-1.85622	4.28479e-43	1.75214e-40	Ntab-K326_AWOJ-SS9321	16112	18354	+	1737	PF00249:Myb-like DNA-binding domain
gene_30571	125.048	448.28	-1.84299	1.17732e-37	3.85826e-35	Ntab-K326_AWOJ-SS17950	849669	850846	.	1178	PF00847:AP2 domain
gene_68082	63.002	260.698	-2.05194	1.79737e-32	4.73173e-30	Ntab-K326_AWOJ-SS622	40991	48391	.	7401	PF07727:Reverse transcriptase (RNA-dependent DNA polymerase)
gene_52300	13.8314	135.889	-3.29801	4.93207e-28	1.01289e-25	Ntab-K326_AWOJ-SS322601	4	4038	.	4035	-
gene_64075	86.6633	279.969	-1.69545	1.34246e-24	2.23138e-22	Ntab-K326_AWOJ-SS534	756576	758232	+	1484	-
gene_67681	38.8586	171.236	-2.1454	4.04853e-22	5.80977e-20	Ntab-K326_AWOJ-SS61344	5	3272	.	3268	-
gene_53845	100.678	308.539	-1.62114	9.05465e-21	1.18191e-18	Ntab-K326_AWOJ-SS342	455922	457770	-	1282	-
gene_34088	69.2895	220.012	-1.67384	9.46672e-19	1.05407e-16	Ntab-K326_AWOJ-SS18443	181116	181690	.	575	-
gene_52130	26.385	116.594	-2.15315	8.16521e-16	7.26971e-14	Ntab-K326_AWOJ-SS320	685778	686574	.	797	PF02519:Auxin responsive protein
gene_34086	40.8278	146.473	-1.84139	1.63779e-15	1.40406e-13	Ntab-K326_AWOJ-SS18443	179821	180265	.	445	-
gene_81856	18.4764	94.5577	-2.34853	1.66789e-14	1.30849e-12	Ntab-K326_AWOJ-SS9194	479297	484262	-	4966	-
gene_68625	32.0933	115.907	-1.85093	1.15946e-13	8.20465e-12	Ntab-K326_AWOJ-SS6343	15863	17185	.	1323	PF03055:Retinal pigment epithelial membrane protein
gene_24906	48.2149	148.46	-1.62387	1.33931e-12	8.55973e-11	Ntab-K326_AWOJ-SS16396	110991	112474	-	1392	PF00643:B-box zinc finger
gene_34087	29.3604	111.595	-1.93407	2.86731e-12	1.77129e-10	Ntab-K326_AWOJ-SS18443	180395	180842	.	448	-
gene_37346	34.4853	107.717	-1.64252	2.72058e-11	1.5201e-09	Ntab-K326_AWOJ-SS19059	905129	906862	+	1611	PF00201:UDP-glucoronosyl and UDP-glucosyl transferase
gene_83651	15.7768	83.1762	-2.38876	1.21793e-10	6.29509e-09	Ntab-K326_AWOJ-SS9563	20499	21471	.	973	PF13833:EF-hand domain pair
gene_34085	23.6852	88.0404	-1.89603	2.05662e-10	1.03747e-08	Ntab-K326_AWOJ-SS18443	178809	179055	.	247	-
gene_57224	13.5558	74.2595	-2.45583	3.24397e-10	1.57621e-08	Ntab-K326_AWOJ-SS38368	2508	3449	.	942	-
gene_36512	22.1638	81.7753	-1.88284	6.62973e-10	3.07577e-08	Ntab-K326_AWOJ-SS18813	452459	455124	-	1488	PF02309:AUX/IAA family
gene_2175	16.0699	70.1438	-2.11571	1.5601e-09	6.80084e-08	Ntab-K326_AWOJ-SS10454	615317	616963	.	1647	-
gene_68492	3.83351	43.3925	-3.51245	1.59901e-09	6.95082e-08	Ntab-K326_AWOJ-SS6321	140509	141684	.	1176	-
gene_82003	25.017	83.065	-1.73823	3.19864e-09	1.32558e-07	Ntab-K326_AWOJ-SS9219	46546	47187	.	642	-
gene_78588	8.32517	51.1486	-2.61906	3.60689e-09	1.48017e-07	Ntab-K326_AWOJ-SS8538	136074	136960	.	887	PF13833:EF-hand domain pair
gene_60174	24.1122	79.6154	-1.72043	3.87355e-09	1.58257e-07	Ntab-K326_AWOJ-SS450	96253	98066	.	1814	-
gene_36334	17.5717	65.4797	-1.89589	7.03184e-09	2.78908e-07	Ntab-K326_AWOJ-SS18775	304811	305713	.	903	PF13639:Ring finger domain
gene_16322	5.4669	40.1559	-2.87147	1.6935e-08	6.39846e-07	Ntab-K326_AWOJ-SS13583	203323	204809	.	1487	-
gene_67006	23.4168	74.0611	-1.65882	2.35713e-08	8.71346e-07	Ntab-K326_AWOJ-SS598	329118	330890	+	1678	PF14383:DUF761-associated sequence motif
gene_19531	15.5019	61.6166	-1.99431	3.32258e-08	1.19945e-06	Ntab-K326_AWOJ-SS1456	390939	394042	.	3104	-
gene_25144	27.294	84.7175	-1.63092	3.51526e-08	1.26113e-06	Ntab-K326_AWOJ-SS16447	97119	101233	+	1647	-
gene_60563	11.8365	59.5446	-2.33477	6.37742e-08	2.19916e-06	Ntab-K326_AWOJ-SS4608	186488	187064	.	577	PF00847:AP2 domain
gene_75999	10.1594	48.9446	-2.28174	1.01633e-07	3.3665e-06	Ntab-K326_AWOJ-SS7973	277228	277894	.	667	-
gene_7671	7.76141	41.8866	-2.41057	2.54082e-07	7.87433e-06	Ntab-K326_AWOJ-SS11727	530943	531853	.	911	-
gene_51079	16.6431	58.4427	-1.81803	2.99092e-07	9.1164e-06	Ntab-K326_AWOJ-SS307	265819	266521	.	703	-
gene_23843	22.5724	70.66	-1.63565	1.4064e-06	3.78933e-05	Ntab-K326_AWOJ-SS16047	7883	10354	+	1587	PF00481:Protein phosphatase 2C
gene_21747	8.02773	42.8364	-2.42793	1.50032e-06	4.01429e-05	Ntab-K326_AWOJ-SS152784	801	2513	-	971	PF02183:Homeobox associated leucine zipper|PF00046:Homeobox domain
gene_14756	3.84805	30.1612	-2.98026	1.64249e-06	4.35435e-05	Ntab-K326_AWOJ-SS13247	228689	229309	.	621	PF00847:AP2 domain
gene_56433	10.7026	46.2836	-2.10654	1.91929e-06	5.01904e-05	Ntab-K326_AWOJ-SS373061	11447	15422	+	2037	-
gene_74641	3.4604	28.9841	-3.06096	2.4348e-06	6.20217e-05	Ntab-K326_AWOJ-SS7661	834487	837019	-	1040	-
gene_13552	8.26916	36.4801	-2.13861	3.66289e-06	8.97429e-05	Ntab-K326_AWOJ-SS12952	628348	629356	.	1009	-
gene_35753	20.489	61.6153	-1.5881	3.70077e-06	9.06227e-05	Ntab-K326_AWOJ-SS18659	173418	174678	.	1261	PF00847:AP2 domain
gene_23184	11.0924	46.0774	-2.05437	4.76261e-06	0.000113439	Ntab-K326_AWOJ-SS15788	138644	139504	+	729	-
gene_6062	1.82916	66.575	-5.22538	5.52862e-06	0.000129416	Ntab-K326_AWOJ-SS11362	81024	86829	.	5806	-
gene_35112	18.4308	55.4014	-1.59454	6.5405e-06	0.000150211	Ntab-K326_AWOJ-SS18572	153310	154543	.	1234	PF13912:C2H2-type zinc finger
gene_34876	6.20368	30.9621	-2.31859	9.54404e-06	0.000210708	Ntab-K326_AWOJ-SS18520	105680	107805	-	2034	PF16135:TPL-binding domain in jasmonate signalling
gene_34778	12.0561	41.7245	-1.79502	1.10635e-05	0.000240574	Ntab-K326_AWOJ-SS18508	75458	82045	-	3943	-
gene_78589	3.38689	26.3575	-2.93589	1.7281e-05	0.000359695	Ntab-K326_AWOJ-SS8538	167774	168673	.	900	PF13833:EF-hand domain pair|PF13499:EF-hand domain pair
gene_19187	7.1862	31.367	-2.11769	1.95134e-05	0.000401994	Ntab-K326_AWOJ-SS14460	225788	226571	.	784	-
gene_55189	6.19857	29.4431	-2.24142	2.00351e-05	0.000411459	Ntab-K326_AWOJ-SS3573	361623	363224	.	1602	PF04564:U-box domain
gene_62300	8.2837	32.0642	-1.9547	3.06376e-05	0.000599113	Ntab-K326_AWOJ-SS494	408701	414736	+	2783	-
gene_29518	9.76884	36.1205	-1.89768	3.37249e-05	0.000653674	Ntab-K326_AWOJ-SS17828	258204	259435	.	1232	PF00168:C2 domain
gene_43418	12.9557	42.1028	-1.68764	3.54871e-05	0.000681825	Ntab-K326_AWOJ-SS2089	73715	76889	+	3175	-
gene_12213	7.4909	30.811	-2.0271	4.82827e-05	0.000890638	Ntab-K326_AWOJ-SS1268	38008	39721	.	1714	-
gene_2374	6.14983	27.1728	-2.13475	6.10167e-05	0.00109536	Ntab-K326_AWOJ-SS1050	470388	475143	+	1088	PF06749:Protein of unknown function (DUF1218)
gene_49437	10.5927	36.1049	-1.75487	9.94612e-05	0.00167124	Ntab-K326_AWOJ-SS286040	22	990	.	969	-
gene_15798	6.16948	26.5738	-2.10428	0.000112355	0.00186349	Ntab-K326_AWOJ-SS13482	65134	74974	-	9454	-
gene_72422	11.1347	35.7962	-1.69336	0.000115084	0.00190125	Ntab-K326_AWOJ-SS7169	38689	39991	.	1303	-
gene_77325	13.704	41.977	-1.60542	0.000116424	0.00191927	Ntab-K326_AWOJ-SS8269	13951	17074	+	2940	-
gene_57163	6.44726	27.7652	-2.09341	0.000134294	0.0021705	Ntab-K326_AWOJ-SS382042	1091	1383	.	293	-
gene_20553	10.5471	35.4851	-1.76884	0.000141457	0.00226723	Ntab-K326_AWOJ-SS14887	597	1438	.	842	-
gene_69479	11.5586	39.4067	-1.75499	0.000144516	0.00231225	Ntab-K326_AWOJ-SS6518	248895	249210	.	316	-
gene_13233	5.10107	24.0101	-2.21717	0.00015767	0.00249031	Ntab-K326_AWOJ-SS1289	550464	555022	-	2135	-
gene_19012	8.40811	30.1889	-1.86096	0.000208434	0.00315987	Ntab-K326_AWOJ-SS14419	24619	25289	.	671	-
gene_51082	9.14489	31.4068	-1.79972	0.000244183	0.0036039	Ntab-K326_AWOJ-SS307	369359	369675	.	317	-
gene_21196	10.5782	33.5049	-1.65109	0.00026512	0.00386822	Ntab-K326_AWOJ-SS15087	84020	84507	.	488	-
gene_55067	11.0663	34.0774	-1.6213	0.000307256	0.00438742	Ntab-K326_AWOJ-SS3565	173750	177697	.	3948	-
gene_22003	9.6859	30.4823	-1.6619	0.000347945	0.00487355	Ntab-K326_AWOJ-SS1537	683650	714055	-	2678	-
gene_44046	7.93241	27.1485	-1.77038	0.000373185	0.00517841	Ntab-K326_AWOJ-SS216	8803	10887	.	2085	PF12937:F-box-like
gene_14421	7.90332	27.1188	-1.78016	0.000417999	0.00571278	Ntab-K326_AWOJ-SS1318	376744	378381	.	1638	-
gene_19405	6.57894	25.0316	-1.92979	0.00045518	0.00611602	Ntab-K326_AWOJ-SS14523	190348	190980	.	633	-
gene_11181	10.6859	32.9136	-1.62497	0.000518508	0.006847	Ntab-K326_AWOJ-SS12480	116180	118404	+	1251	PF02309:AUX/IAA family
gene_30411	8.64442	27.5126	-1.67577	0.000616383	0.00788097	Ntab-K326_AWOJ-SS17937	53906	54934	.	1029	PF02519:Auxin responsive protein
gene_77487	6.92296	22.7095	-1.72229	0.00145129	0.016136	Ntab-K326_AWOJ-SS830	849097	853051	.	3955	-
gene_7320	6.90842	22.5319	-1.71008	0.00151607	0.0167274	Ntab-K326_AWOJ-SS11653	67597	69180	.	1584	PF00069:Protein kinase domain|PF13855:Leucine rich repeat
gene_25038	6.90842	22.8562	-1.72	0.00177627	0.0190968	Ntab-K326_AWOJ-SS16430	21810	27737	+	2026	PF13966:zinc-binding in reverse transcriptase
gene_77480	8.37902	26.1744	-1.6528	0.0021095	0.021959	Ntab-K326_AWOJ-SS830	37847	38256	.	410	-
gene_82753	7.01102	22.1093	-1.66447	0.00298579	0.0291171	Ntab-K326_AWOJ-SS9397	341104	342809	-	1487	-
gene_49316	8.20291	25.2091	-1.60271	0.00382102	0.0354542	Ntab-K326_AWOJ-SS2848	30986	32219	.	1234	-
